# Supplementary material
Source: Springer Nature journal article supplement (https://www.springermedizin.de/resource/supplementary/12984_2009_243_MOESM7_ESM.pdf/9605606)

**A****Finger Extension**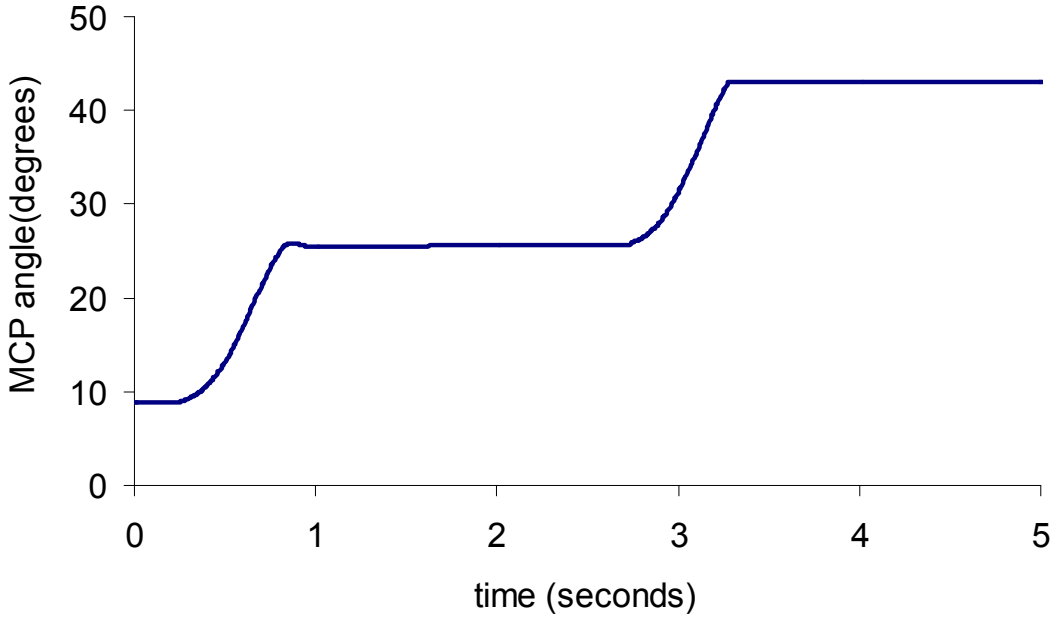**B****Torque**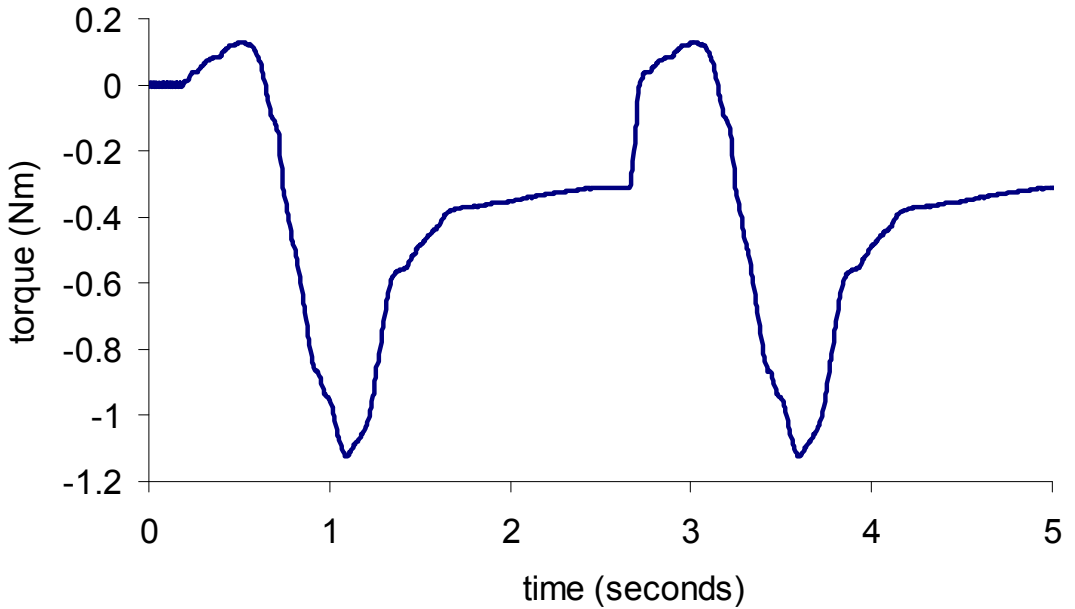

Supplement: MOESM7 [file 9605606]
